# Supplementary material for: Coproduction of succinic acid and cadaverine using lysine as a neutralizer and CO2donor withl-lysine decarboxylase overexpressedEscherichia coliAFP111
Source: Royal Society of Chemistry journal article supplement (doi:10.1039/c8gc00224j), 2018-01-01
Supplement: c8gc00224j1.pdf [file c8gc00224j1.pdf]

## Supplementary information

### **Coproduction of succinic acid and cadaverine using lysine as neutralizer and CO<sub>2</sub> donor with L-lysine decarboxylase overexpressed *Escherichia coli* AFP111**

Jing Wang,<sup>a</sup> Jingwen Mao,<sup>a</sup> Weilong Tian,<sup>a</sup> Guoguang Wei,<sup>a</sup> Sheng Xu,<sup>a</sup> Weichao Ma,<sup>b</sup> Kequan Chen,<sup>\*a</sup> Min Jiang<sup>a</sup> and Pingkai Ouyang<sup>a</sup>

- a. State Key Laboratory of Materials-Oriented Chemical Engineering, College of Biotechnology and Pharmaceutical Engineering, Nanjing Tech University, Nanjing 211816, Jiangsu, China. E-mail: kqchen@njtech.edu.cn
- b. College of Bioengineering and Biotechnology, Tianshui Normal University, Tianshui, 741001, Gansu, China.

## **Supplementary Methods and Results**

### **Calculation of CO<sub>2</sub> net emission**

To verify the net emission of CO<sub>2</sub>, a contrastive experiment with a different reactor and small system was conducted. After cell cultivation and decarboxylase induction, the fermentation broth supplemented with glucose (10 g L<sup>-1</sup>) was transferred to a sealed and sterilized blue-lid flask (10-mL) with N<sub>2</sub> access for 2 min to ensure anaerobic conditions. The contrastive experiment was performed with supply of 10 g L<sup>-1</sup> lysine to utilize decarboxylate CO<sub>2</sub>. At the end of anaerobic fermentation, concentration of succinic acid, cadaverine, acetate and ethanol was investigated to calculate the net emission of CO<sub>2</sub>. Experiments were carried out in triplicate, and the data are presented as mean values with standard deviation.

### **Investigation of aspartate and amino acids derivatives**

The aspartate metabolic pathway was shown as Fig. S5. Aspartate and some of amino acid derivatives (marked in red) in the same samples were also analyzed by HPLC. The exact product concentrations were determined using high-performance liquid chromatography after labelling with phenylisothiocyanate (PITC), using a 1290 facility (Agilent Technologies, USA) equipped with a C18 column (5 µm, 250 mm × 4.6 mm, Grace, USA) at room temperature. Mobile phase A consisted of 7% (v/v) acetonitrile in 0.1 M sodium acetate aqueous solution, and mobile phase B consisted of 80% (v/v) acetonitrile in water. PITC derivatives were separated with a gradient of 97:3 to 30:70 (v/v) of A: B over 50 min and detected at an absorbance of 254 nm. The results were list in Table S1. Furthermore, the important metabolite aspartate was also detected by MS facility and the results suggested that only about one third of it was <sup>13</sup>C labelled aspartate (Fig. S6). Experiments were carried out in triplicate, and the data are presented as mean values with standard deviation.

### **Calculation of CO<sub>2</sub> fixation efficiency by carboxylation metabolic pathway of succinic acid**

To calculate amount of CO<sub>2</sub> released from decarboxylation process using for the carboxylation metabolic pathway of succinic acid. The contrastive experiment of succinic acid fermentation was performed without supply lysine as CO<sub>2</sub> donor as

control. The amount of decarboxylate CO<sub>2</sub> utilized by the carboxylation metabolic pathway of succinic acid (E) can be calculated through the following equation:

$$E = \frac{F_1 - F_0}{R} \times 100\%$$

here

F<sub>1</sub>, represents the amount of fixed CO<sub>2</sub> by the succinic acid pathway with the supply of L-lysine, which can be calculated from succinic acid produced.

F<sub>0</sub>, represents the amount of fixed CO<sub>2</sub> by the succinic acid pathway without the supply of L-lysine, which can be calculated from succinic acid produced.

R is the amount of CO<sub>2</sub> released from decarboxylation process, which can be calculated from cadaverine content.

With the supply of L-lysine, succinic acid was detected as 0.18 mol L<sup>-1</sup>, while the production of succinic acid without any supply of L-lysine was 0.014 mol L<sup>-1</sup>. Furthermore, the amount of CO<sub>2</sub> released from decarboxylation process was detected as 0.22 mol L<sup>-1</sup>. Thus, the final equation for calculation of the CO<sub>2</sub> fixation efficiency is as follows:

$$E = \frac{0.18 - 0.014}{0.22} \times 100\%$$

These results showed that 75.45% of CO<sub>2</sub> released from decarboxylation process could be utilized by the carboxylation metabolic pathway of succinic acid.

## Supplementary Tables

**Table S1 Concentrations of amino acids involved in aspartate metabolism**

| Amino acids | Concentrations (mmol L <sup>-1</sup> ) |
|-------------|----------------------------------------|
| Aspartate   | 2                                      |
| Methionine  | 0.078                                  |
| Arginine    | 0.067                                  |
| Citrulline  | 0.047                                  |
| lysine      | Not detected                           |
| ornithine   | Not detected                           |

---

threonine

Not detected

---

### Supplementary Figures

**Figure S1: ESI-TOF-MS spectrum of  $^{12}\text{C}$ -Succinic acid (Standard sample)**

**Figure S2: ESI-TOF-MS/MS spectrum of  $^{12}\text{C}$ -Succinic acid (Standard sample)**

**Figure S3: ESI-TOF-MS spectrum of  $^{13}\text{C}$ -Succinic acid**

**Figure S4: ESI-TOF-MS/MS spectrum of  $^{13}\text{C}$ -Succinic acid**

**Figure S5: Brief biochemical pathways of aspartate derivatives in *E. coli***

**Figure S6: ESI-TOF-MS spectrum of  $^{12}\text{C}$ -Aspartate and  $^{13}\text{C}$ -Aspartate**

**Figure S7: Net emission of  $\text{CO}_2$  during anaerobic stage**

**Figure S8: Enzyme activity of CadA with two different chemical inducers**

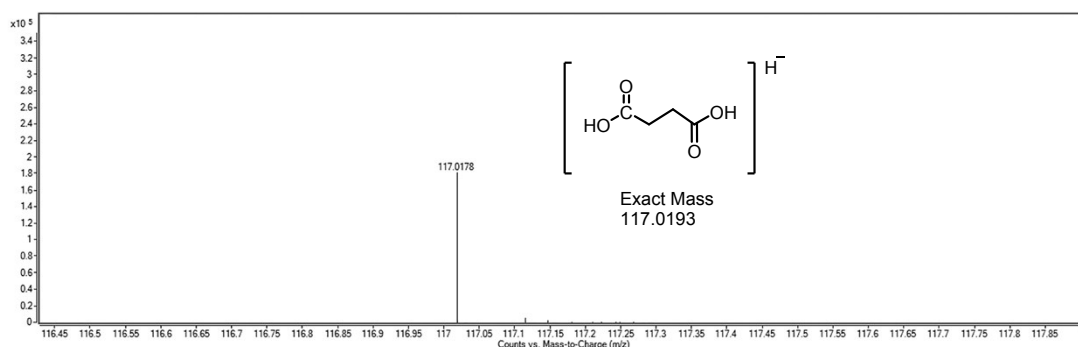

Figure S1 ESI-TOF-MS spectrum of  $^{12}\text{C}$ -Succinic acid

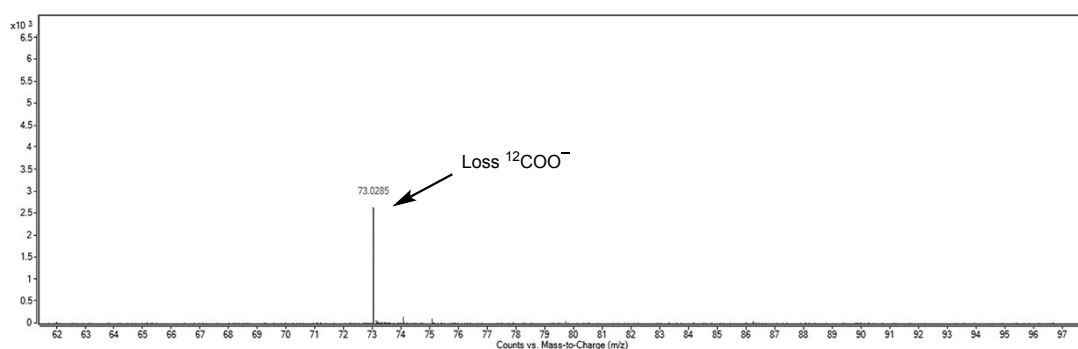

Figure S2 ESI-TOF-MS/MS spectrum of  $^{12}\text{C}$ -Succinic acid

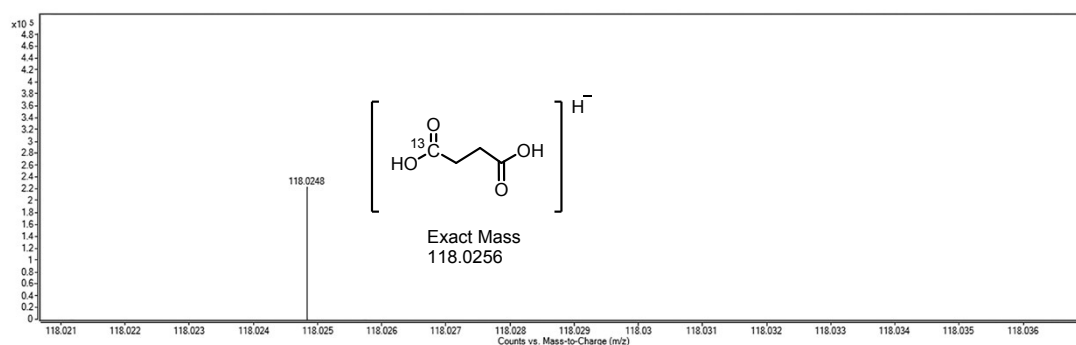

Figure S3 ESI-TOF-MS spectrum of  $^{13}\text{C}$ -Succinic acid

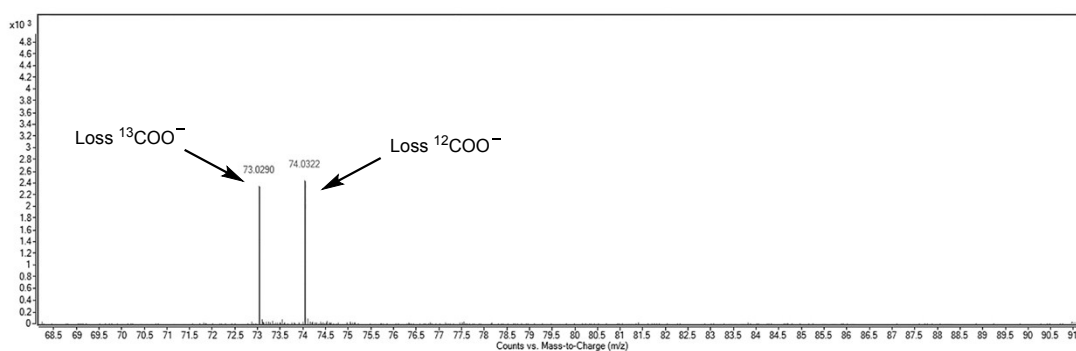

Figure S4 ESI-TOF-MS/MS spectrum of  $^{13}\text{C}$ -Succinic acid

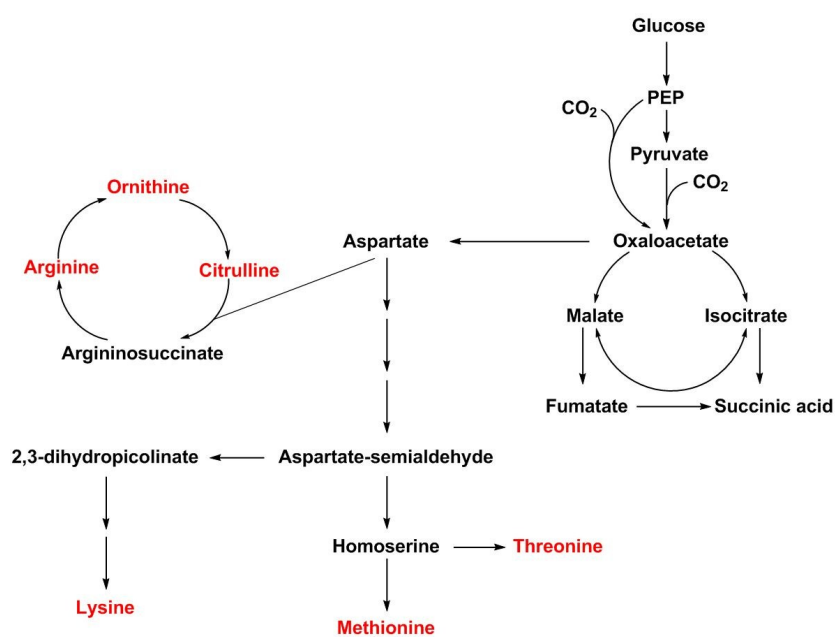

Figure S5 Brief biochemical pathways of aspartate derivatives in *E. coli*

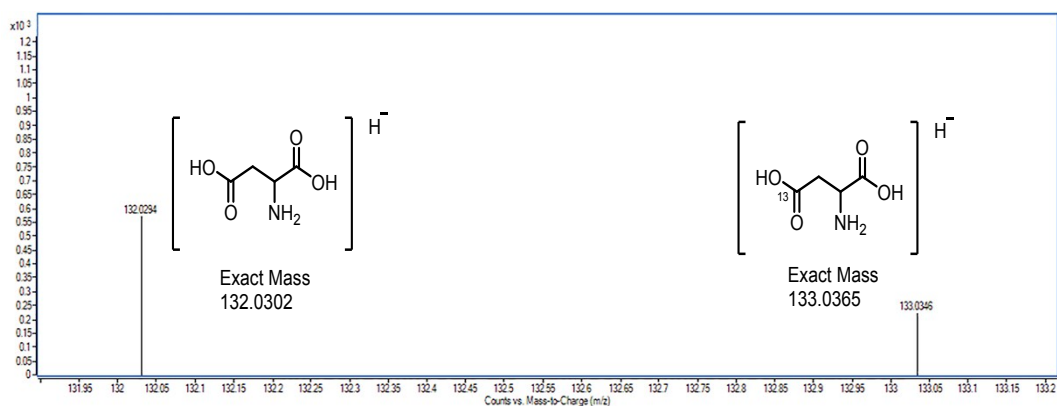

Figure S6 ESI-TOF-MS spectrum of  $^{12}\text{C}$ -Aspartate and  $^{13}\text{C}$ -Aspartate

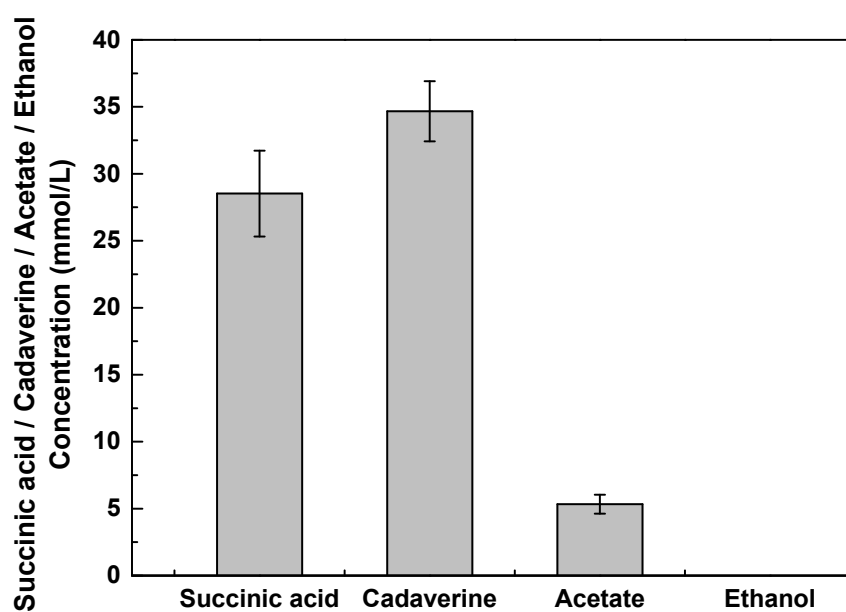

Figure S7 Net emission of  $\text{CO}_2$  during anaerobic stage

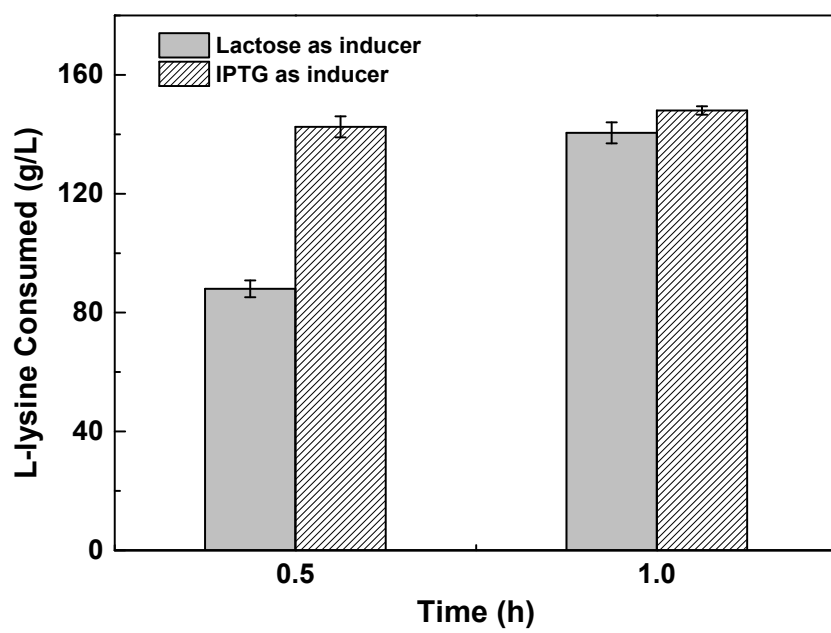

Figure S8 The effects of different inducers on enzyme activity of CadA by analyzing L-lysine consumption
